# Supplementary material
Source: PubMed Central journal article supplement (PMC4926765)
Supplement: massspectrometry-5-1-A0047-math001.pdf [file massspectrometry-5-1-A0047-math001.pdf]

$$\sigma_w = \sqrt{\sum_{n=1}^N [P_w(n) - \mu_w]^2 / N}.$$
